# Supplementary material
Source: publisher figshare collection journal article supplement (https://karger.figshare.com/ndownloader/files/28367187)
Supplement: Supplementary file 1 [file 28367187]

***Supplemental Information***

**Table S1. Specific primers and probes used for gene expression analysis**

| Gene  (Protein) | Forward Primer | Reverse Primer | Probe |
| --- | --- | --- | --- |
| Havcr1  (KIM-1) | GGAATGGCACTGTGACATCCT | CTGCGGCTTCCTCAAAGG | AGGAGGCCTGGAATAATCACACTGTAAGA |
| Col1a1  (COL1A1) | GAAGCATGTCTGGTTTGGAGAGA | ATCGGAACCTTCGCTTCCAT | TGACCGATGGATTCCAGTTCGA |
| Timp-1  (TIMP-1) | CCGCAGCGAGGAGTTTCTC | GGCAGTGATGTGCAAATTTCC | TCGCGGGCCGTTTAAGGAA |
| Nppa  (ANP) | GGGGGTAGGATTGACAGGAT | TCGAGCAGATTTGGCTGTTA | CCCAGAGCGGACTAGGCTGCAA |
| Spp1  (ONP) | TCACCTCCCGCATGAAGAG | CTCAGACGCTGGGCAACTG | CAGGAGTCCGATGAGGCTATCAAGGTCATC |
| Serpine 1  (PAI-1) | CCATGATGGCTCAGAACAAC | GTTCCAGGATGTCGTACTCGT | TTCAACTACACTGAGTTCACCACTCCGGAT |

**Table S2. Body weight development during the study at week 1, 3, 5 and 7 (study end).**

| week | Control | Placebo | Empagliflozin 3mg/kg | Empagliflozin 10mg/kg | Finerenone 1mg/kg | Finerenone 3mg/kg | Combination 3 + 1 |
| --- | --- | --- | --- | --- | --- | --- | --- |
| 1 | 189.5  ± 1.3*** | 226.9  ± 3.9 | 232.8  ± 2.8 | 224.2  ± 3.7 | 229.4  ± 3.6 | 229.2  ± 3.4 | 227.4  ± 3.4 |
| 3 | 216.7  ± 1.4*** | 248.1  ± 4.6 | 258.8  ± 2.9 | 248.1  ± 4.2 | 244.9  ± 4.3 | 251.2  ± 3.2 | 251.4  ± 3.9 |
| 5 | 231.8  ± 2.0*** | 267.9  ± 3.2 | 265.4  ± 2.7 | 261.0  ± 1.6 | 271.3  ± 4.5 | 271.5  ± 2.5 | 269.9  ± 6.1 |
| 7 | 231.8  ± 2.0*** | 267.9  ± 3.2 | 265.4  ± 2.7 | 261.0  ± 1.6 | 248.4  ± 19.5 | 271.5  ± 2.5 | 269.9  ± 6.1 |

Data are mean ± SEM; ***p<0.005, vs. placebo.

**Figure S1. Urinary volume and organ weights per body weight**

B

D

A

C

Urinary volume/body weight determined after 2 (A) and 6 weeks (B), heart weight/body weight determined at study end (C) and kidney weight/body weight at study end (D), respectively. Data are mean ± SEM.

**Figure S2. Renal and cardiac gene expression**

F

D

B

A

C

E

Shown are relative expression to mean control=1 of renal KIM-1 (A), renal TIMP-1 (B), renal COL1a1 (C), cardiac ANP (D), cardiac OPN € and cardiac PAI-1 (F). Data are mean ± SEM, ***p<0.005, **p<0.01, *p<0.05 vs. placebo.
